# Supplementary material for: Epinephrine Enhances the Response of Macrophages under LPS Stimulation
Source: Hindawi journal article supplement (doi:10.1155/2014/254686), 2014-01-01
Supplement: f1 [file 254686.f1.docx]

**Optional Supplementary Materials**


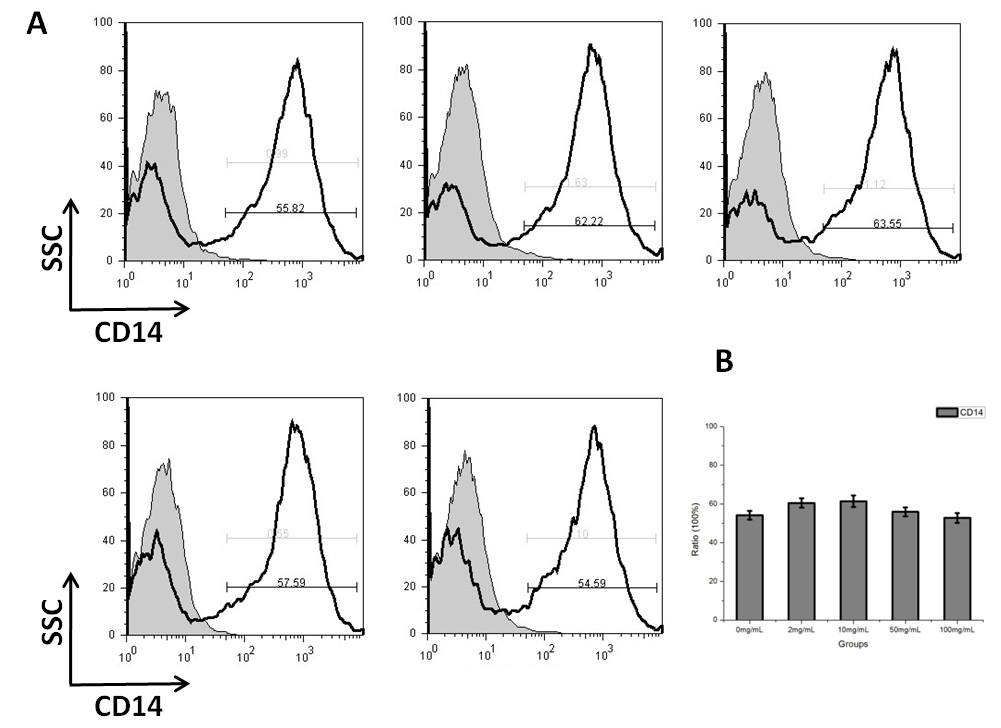


FIGURE S1 : Dose-dependent effect of epinephrine on CD14 expression level of macrophages under LPS stimulation. The peritoneal macrophages of C57BL/6 mice in vitro were pretreated with epinephrine at various concentrations (0, 2, 10, 50 and 100 ng/mL) and incubated for an additional hour at 37°C and 5% CO2, then stimulated with 10 ng/mL LPS for another hour under the same conditions. Macrophages were thereafter collected, stained with APC-CD14 and measured by flow cytometry （BD FACS Calibur）. Flowjo 7.6.1 and Origin 7.5 were adopted to analyze the data including (A) The ratio of CD14+/live macrophages in groups with different doses of epinephrine (upper: 0ng/mL, 2 ng/mL, 10 ng/mL, from left to right; lower: 50 ng/mL, 100 ng/mL, from left to right); and (B)Changes in CD14+ populations following epinephrine administration with different concentrations under LPS stimulation.


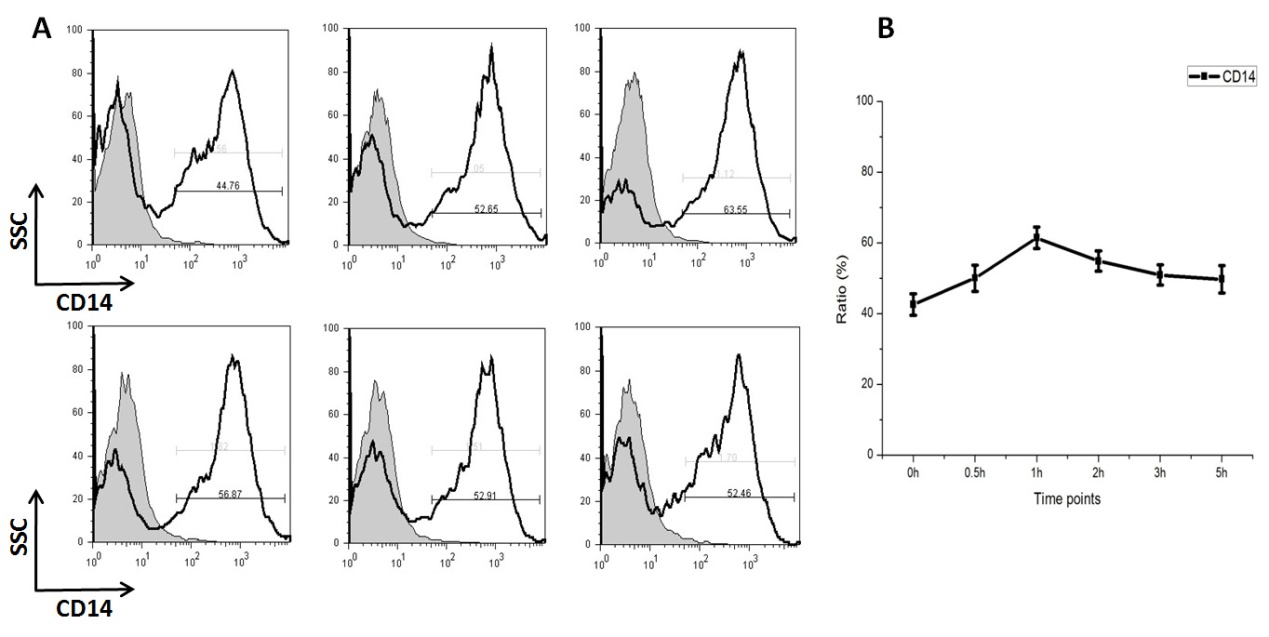


FIGURE S2 : Time-dependent effect of epinephrine on CD14 expression level of macrophages under LPS stimulation. The peritoneal macrophages of C57BL/6 mice in vitro were pretreated with epinephrine 10 ng/mL and incubated for varying periods of time (0, 0.5, 1, 2, 3 and 5 hours) at 37°C and 5% CO2, then stimulated with 10 ng/mL LPS for another hour under the same conditions. Macrophages were thereafter collected, stained with APC-CD14 and measured by flow cytometry （BD FACS Calibur）. Flowjo 7.6.1 and Origin 7.5 were adopted to analyze the data including (A) The ratio of CD14+/live macrophages in groups at different time points pretreated by epinephrine (upper: 0h, 0.5h, 1h, from left to right; lower: 2h, 3h, 5h, from left to right); and (B)Changes in CD14+ populations following epinephrine administration with different time points under LPS stimulation.
